# Supplementary material for: Hydrological trade-offs due to different land covers and land uses in the Brazilian Cerrado
Source: Copernicus journal article supplement (doi:10.5194/hess-23-1263-2019), 2019-03-07
Supplement: Supplementary file 1 [file hess-23-1263-2019-supplement.zip]

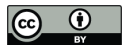

## *Supplement of*

# **Hydrological trade-offs due to different land covers and land uses in the Brazilian Cerrado**

**Jamil A. A. Anache et al.**

*Correspondence to:* Jamil A. A. Anache ([jamil.anache@usp.br](mailto:jamil.anache@usp.br))

- [hess-23-1263-2019-supplement-title-page.pdf](#)
- [supplement](#)
  - [S1\\_soil\\_moisture.txt](#)
  - [S1\\_wb\\_bare\\_soil.txt](#)
  - [S1\\_wb\\_pasture.txt](#)
  - [S1\\_wb\\_sugarcane.txt](#)
  - [S1\\_wb\\_wooded\\_cerrado.txt](#)
  - [S2\\_gw\\_fluctuation.txt](#)
  - [readme.txt](#)

The copyright of individual parts of the supplement might differ from the CC BY 4.0 License.
